# Supplementary material
Source: PubMed Central journal article supplement (PMC5746671)
Supplement: blood801001-suppl1.pdf [file blood801001-suppl1.pdf]

# Supplement Figures:

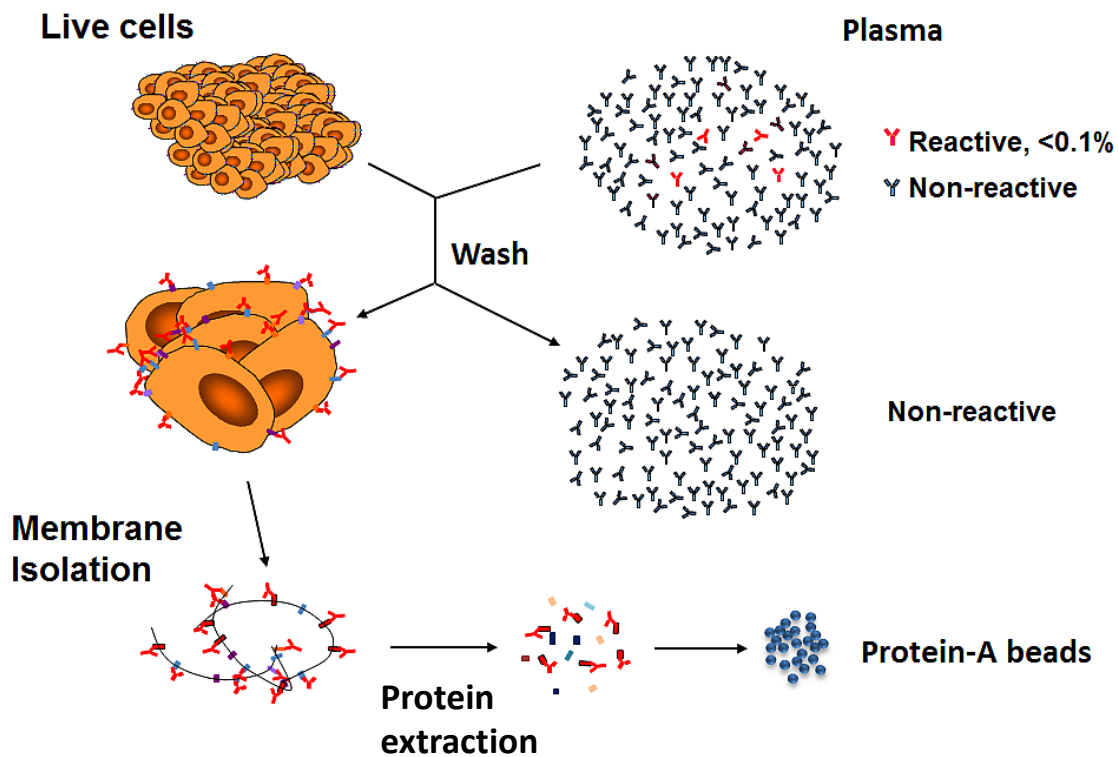

Supplement Figure 1.

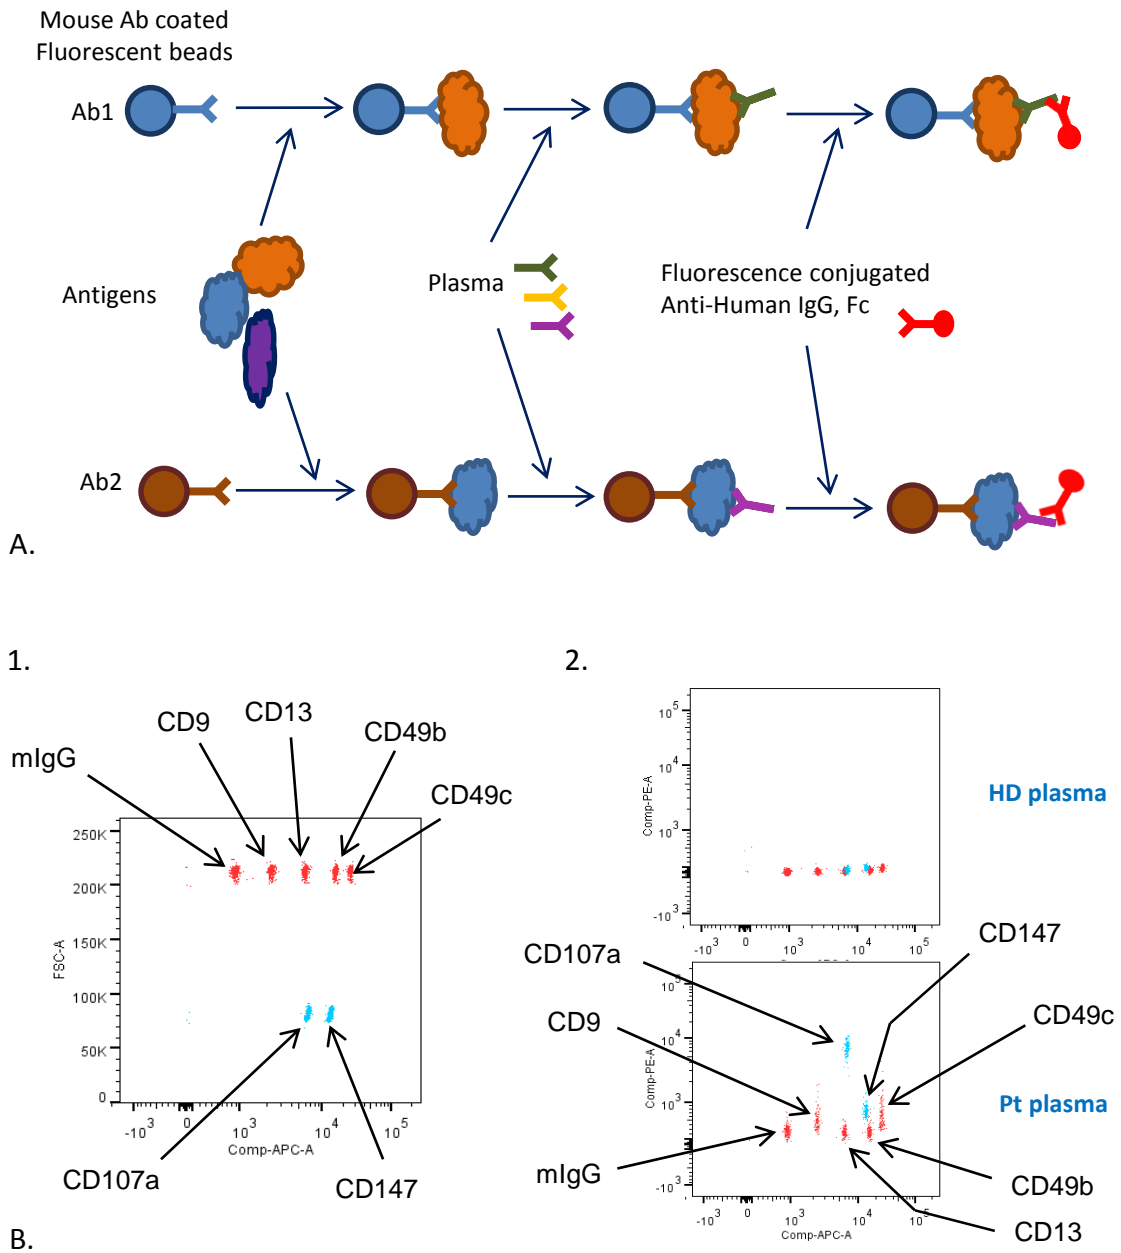

Supplement Figure 2. Antigen trapping multiplex bead array-FACS

A. Schematics of the FACS based antigen trapping beads array.

B. The read out of the array on flow cytometer: 1. The separation of beads with different antigens on APC/FSC channel. 2. The readout of antibody reactivity against specific antigens on PE channel.
